# Supplementary material for: Genetic Dissection of Yield and Its Component Traits Using High-Density Composite Map of Wheat Chromosome 3A: Bridging Gaps between QTLs and Underlying Genes
Source: PubMed Central journal article supplement (PMC3722237; doi:10.1371/journal.pone.0070526), 2013-07-24

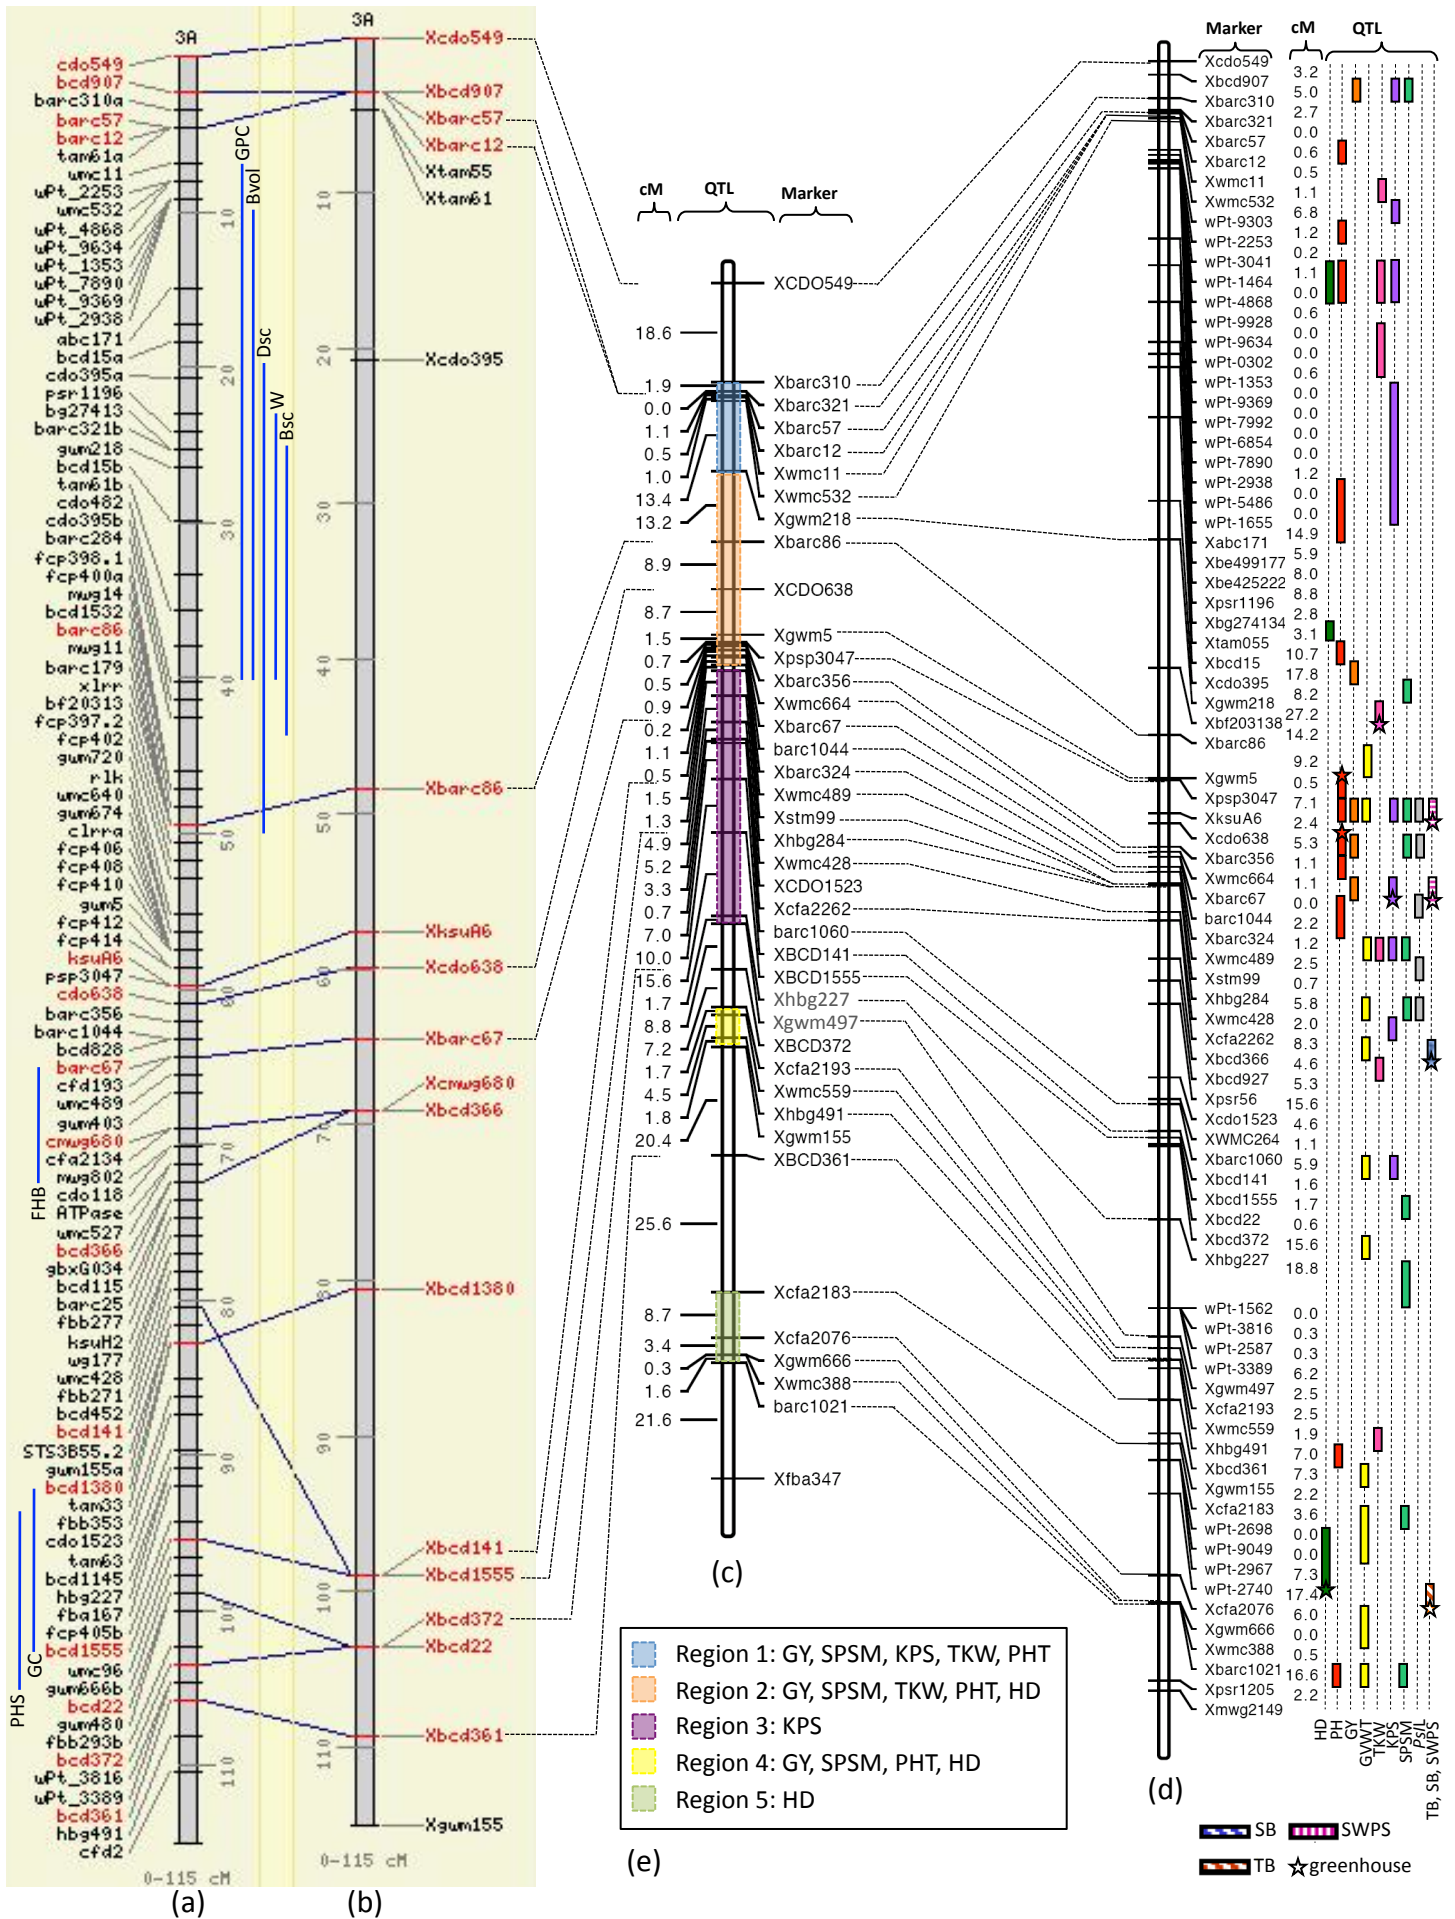

Supplement: pone.0070526.s001.pdf [file pone.0070526.s001.pdf]
